# Supplementary material
Source: PubMed Central journal article supplement (PMC554130)

S3: Stereo view of the interface between (HhH)<sub>2</sub> domains, viewed approximately along the two-fold axis. Sidechains from protomer A are coloured in magenta and labelled; sidechains from protomer B are unlabelled.

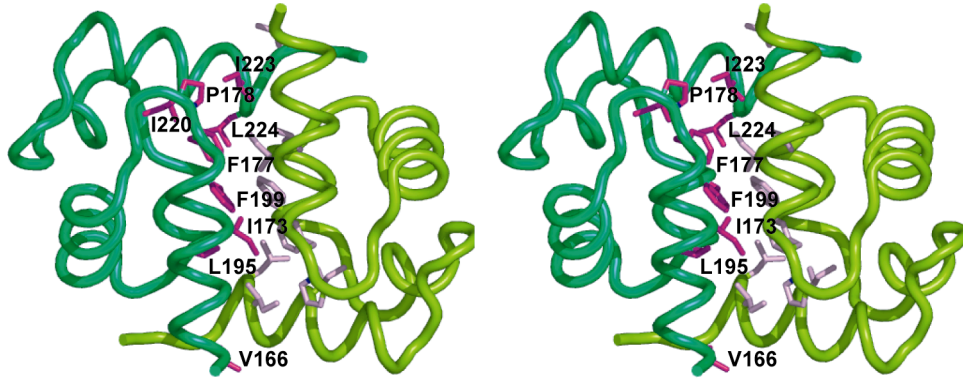

Supplement: 7600581s3.pdf [file 7600581s3.pdf]
