# Supplementary material
Source: PubMed Central journal article supplement (PMC554130)

S4: A crystallographic dimer of dimers of the apo-ApeXPF. Protein chains for the ApeXPF dimer are marked A (magenta) and B (yellow), with functional domains indicated by the subscripts N (nuclease), L (linker) and H ((HhH)<sub>2</sub>); the symmetry related molecules in the dimer of dimers have a dash superscript. The view is approximately along a crystallographic two-fold axis.

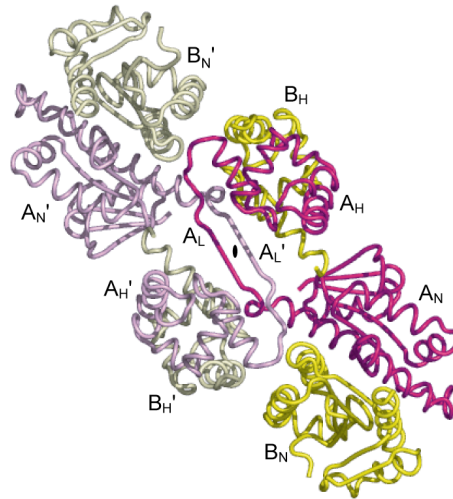

Supplement: 7600581s4.pdf [file 7600581s4.pdf]
