# Supplementary material
Source: PubMed Central journal article supplement (PMC554130)

S5: Stereo view of the interface between the protomer A nuclease domain and (HhH)<sub>2</sub> domain in the ApeXPF-DNA complex. The protein backbone is coloured according to domains as in Figure 1a.

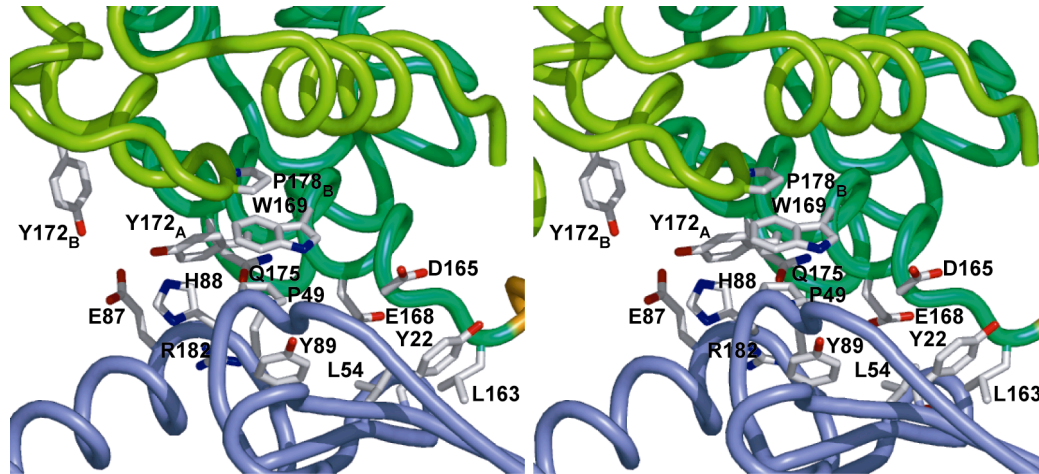

Supplement: 7600581s5.pdf [file 7600581s5.pdf]
